# Supplementary material for: CD146 Molecule Expression in B Cells Acute Lymphoblastic Leukemia (B-ALLs): A Flow-Cytometric Marker for an Accurate Diagnostic Workup
Source: PubMed Central journal article supplement — Mediterr J Hematol Infect Dis. 2024 Sep 1;16(1):e2024064. doi: 10.4084/MJHID.2024.064 (PMC11385270; doi:10.4084/mjhid.2024.064), 2024-09-01
Supplement: MJHID-16-1-e2024064_supplementary.pdf [file MJHID-16-1-e2024064_supplementary.pdf]

Original Article

CD146 Molecule Expression in B Cells Acute Lymphoblastic Leukemia (B-ALLs): A Flow-Cytometric Marker for an Accurate Diagnostic Workup

Supplementary Figures and Tables

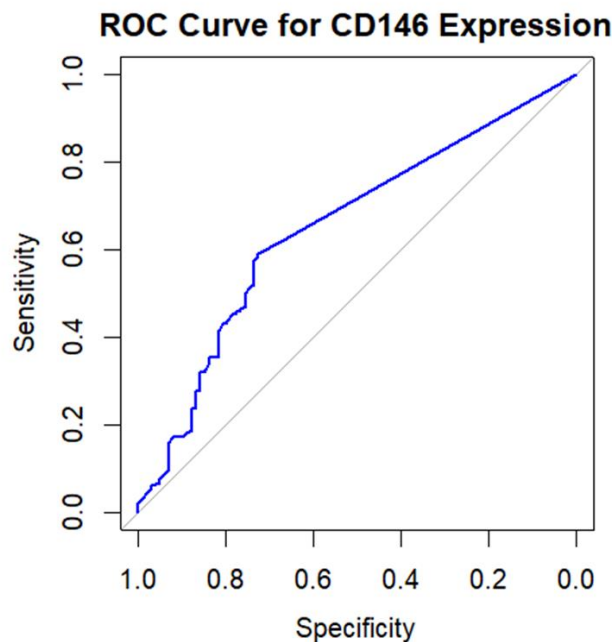

**Supplementary Figure 1.** Receiver Operating Characteristic (ROC) curve for CD146 expression aimed at discriminating between ALL-Ph+ and ALL-Ph-Neg. ROC curve identified 10% as the optimal cut-off to considered CD146 expression “positive”, which maximizes the separation between the BCR::ABL1-positive ALLs and BCR::ABL1-negative ALLs. it would be necessary to recalculate the sensitivity, specificity, and predictive values. The 10% cut-off point on the ROC curve has a Sensitivity of 59%, Specificity of 72%, with Positive Predictive Value of 76% and Negative Predictive Value of 55%.

**Supplementary Table 1.** Comparison of positivity rate of the markers analyzed between Ph+ B-ALL (n=144) and B-ALLs negatives (n= 79).

| Antigens           | Ph + B-ALLs (n=144) | B-ALLs negative (n=79) | p-value |
|--------------------|---------------------|------------------------|---------|
| <b>CD146 n (%)</b> |                     |                        |         |
| Negative           | 70 (49%)            | 57 (72%)               | < 0.001 |
| Positive           | 74 (51%)            | 22 (28%)               |         |
| <b>CD10 n (%)</b>  |                     |                        |         |
| Negative           | 11 (8%)             | 22 (28%)               | < 0.001 |
| Positive           | 133 (92%)           | 57 (72%)               |         |
| <b>CD13 n (%)</b>  |                     |                        |         |
| Negative           | 70 (49%)            | 63 (80%)               | < 0.001 |
| Positive           | 74 (51%)            | 16 (20%)               |         |
| <b>CD33 n (%)</b>  |                     |                        |         |
| Negative           | 72 (50%)            | 57 (72%)               | 0.002   |
| Positive           | 72 (50%)            | 22 (28%)               |         |
| <b>CD66c n (%)</b> |                     |                        |         |
| Negative           | 70 (49%)            | 51 (65%)               | 0.025   |
| Positive           | 74 (51%)            | 28 (35%)               |         |
| <b>CD38 n (%)</b>  |                     |                        |         |
| Negative           | 50 (35%)            | 16 (20%)               | 0.024   |
| Positive           | 94 (65%)            | 63 (80%)               |         |

**Supplementary Table 2.** Comparison of positivity rate of the markers analyzed between B-ALLs negatives (n= 79) and Ph-like B-ALLs (n=19).

| Antigens           | B-ALLs negative<br>(n=79) | Ph-like B-ALLs<br>(n=19) | p-value |
|--------------------|---------------------------|--------------------------|---------|
| <b>CD146 n (%)</b> |                           |                          |         |
| Negative           | 57 (72%)                  | 16 (84%)                 | 0.39    |
| Positive           | 22 (28%)                  | 3 (16%)                  |         |
| <b>CD10 n (%)</b>  |                           |                          |         |
| Negative           | 22 (28%)                  | 0 (0%)                   | 0.006   |
| Positive           | 57 (72%)                  | 19 (100%)                |         |
| <b>CD13 n (%)</b>  |                           |                          |         |
| Negative           | 63 (80%)                  | 16 (84%)                 | > 0.9   |
| Positive           | 16 (20%)                  | 3 (16%)                  |         |
| <b>CD33 n (%)</b>  |                           |                          |         |
| Negative           | 57 (72%)                  | 7 (37%)                  | 0.004   |
| Positive           | 22 (28%)                  | 12 (63%)                 |         |
| <b>CD66c n (%)</b> |                           |                          |         |
| Negative           | 51 (65%)                  | 14 (74%)                 | 0.4     |
| Positive           | 28 (35%)                  | 5 (26%)                  |         |
| <b>CD38 n (%)</b>  |                           |                          |         |
| Negative           | 16 (20%)                  | 9 (47%)                  | 0.021   |
| Positive           | 63 (80%)                  | 10 (53%)                 |         |

**Supplementary Table 3.** Comparison of positivity rate of the markers analyzed between Ph+ B-ALL (n=144) and Ph-like B-ALLs (n=19).

| Antigens           | Ph + B-ALLs<br>(n=144) | Ph-like B-ALLs<br>(n=19) | p-value |
|--------------------|------------------------|--------------------------|---------|
| <b>CD146 n (%)</b> |                        |                          |         |
| Negative           | 70 (49%)               | 16 (84%)                 | 0.003   |
| Positive           | 74 (51%)               | 3 (16%)                  |         |
| <b>CD10 n (%)</b>  |                        |                          |         |
| Negative           | 11 (8%)                | 0 (0%)                   | 0.4     |
| Positive           | 133 (92%)              | 19 (100%)                |         |
| <b>CD13 n (%)</b>  |                        |                          |         |
| Negative           | 70 (49%)               | 16 (84%)                 | 0.004   |
| Positive           | 74 (51%)               | 3 (16%)                  |         |
| <b>CD33 n (%)</b>  |                        |                          |         |
| Negative           | 72 (50%)               | 7 (37%)                  | 0.3     |
| Positive           | 72 (50%)               | 12 (63%)                 |         |
| <b>CD66c n (%)</b> |                        |                          |         |
| Negative           | 70 (49%)               | 14 (74%)                 | 0.043   |
| Positive           | 74 (51%)               | 5 (26%)                  |         |
| <b>CD38 n (%)</b>  |                        |                          |         |
| Negative           | 50 (35%)               | 9 (47%)                  | 0.3     |
| Positive           | 94 (65%)               | 10 (53%)                 |         |

**Supplementary Table 4.** Comparison of expression of the markers analyzed between all the 3 groups: Ph+ B-ALL (n=144), Ph-like ALLs (n= 19) and B-ALLs negatives (n= 79). For this statistical analysis based on 3 groups the Kruskal-Wallis test was used.

| Antigens           | Ph + B-ALLs<br>(n=144)<br>mean ± SD (range) | Ph-like B-ALLs<br>(n=19)<br>mean ± SD (range) | B-ALLs negative<br>(n=79)<br>mean ± SD (range) | p-value |
|--------------------|---------------------------------------------|-----------------------------------------------|------------------------------------------------|---------|
| <b>CD146 (%)</b>   | 29±34 (0-97)                                | 11±28 (0-88)                                  | 15±29 (0-90)                                   | < 0.001 |
| <b>CD146 (MFI)</b> | 89±136 (1-548)                              | 48±144 (2-620)                                | 32±80 (0-550)                                  | < 0.001 |
| <b>CD10 (%)</b>    | 62±25 (1-97)                                | 75±20 (26-90)                                 | 48±33 (0-96)                                   | < 0.001 |
| <b>CD13 (%)</b>    | 32±33 (0-90)                                | 8±14 (0-42)                                   | 16±29 (0-94)                                   | < 0.001 |
| <b>CD33 (%)</b>    | 30±32 (0-97)                                | 38±36 (0-90)                                  | 18±31 (0-90)                                   | < 0.001 |
| <b>CD66c (%)</b>   | 29±29 (0-92)                                | 22±30 (0-90)                                  | 21±29 (0-90)                                   | 0.011   |
| <b>CD38 (%)</b>    | 46±36 (0-97)                                | 39±41 (0-90)                                  | 56±32 (0-96)                                   | 0.095   |
| <b>CD34 (%)</b>    | 63±24 (1-97)                                | 70±28 (0-90)                                  | 53±32 (0-96)                                   | 0.013   |
